# Supplementary material
Source: publisher figshare collection journal article supplement (https://acs.figshare.com/ndownloader/files/4335967)
Supplement: Supplementary file 1 [file 4335967]

data_yh713
_publ_contact_author             'Dr. Satoshi Kojima'
_publ_contact_author_email       'skojima@sci.hiroshima-u.ac.jp'
loop_
_publ_author_name 
                                 Yuichi Hirano
                                 Satoshi Kojima
                                 Yohsuke Yamamoto

_journal_name_full               'the Journal of Organic Chemistry'

_audit_creation_method            SHELXL-97
_chemical_name_systematic
;
 ?
;
_chemical_name_common             ?
_chemical_melting_point           ?
_chemical_formula_moiety          ?
_chemical_formula_sum
 'C6 H2 Br Cl I2'
_chemical_formula_weight          443.24

loop_
 _atom_type_symbol
 _atom_type_description
 _atom_type_scat_dispersion_real
 _atom_type_scat_dispersion_imag
 _atom_type_scat_source
 'C'  'C'   0.0033   0.0016
 'International Tables Vol C Tables 4.2.6.8 and 6.1.1.4'
 'H'  'H'   0.0000   0.0000
 'International Tables Vol C Tables 4.2.6.8 and 6.1.1.4'
 'Cl'  'Cl'   0.1484   0.1585
 'International Tables Vol C Tables 4.2.6.8 and 6.1.1.4'
 'Br'  'Br'  -0.2901   2.4595
 'International Tables Vol C Tables 4.2.6.8 and 6.1.1.4'
 'I'  'I'  -0.4742   1.8119
 'International Tables Vol C Tables 4.2.6.8 and 6.1.1.4'

_symmetry_cell_setting            monoclinic
_symmetry_space_group_name_H-M    'P 21'

loop_
 _symmetry_equiv_pos_as_xyz
 'x, y, z'
 '-x, y+1/2, -z'

_cell_length_a                    4.1459(5)
_cell_length_b                    14.1723(16)
_cell_length_c                    15.5670(17)
_cell_angle_alpha                 90.00
_cell_angle_beta                  91.429(3)
_cell_angle_gamma                 90.00
_cell_volume                      914.38(18)
_cell_formula_units_Z             4
_cell_measurement_temperature     173
_cell_measurement_reflns_used     9068
_cell_measurement_theta_min       3.160
_cell_measurement_theta_max       27.785

_exptl_crystal_description        needle
_exptl_crystal_colour             colorless
_exptl_crystal_size_max           0.56
_exptl_crystal_size_mid           0.04
_exptl_crystal_size_min           0.04
_exptl_crystal_density_meas       ?
_exptl_crystal_density_diffrn     3.220
_exptl_crystal_density_method     'not measured'
_exptl_crystal_F_000              784
_exptl_absorpt_coefficient_mu     11.465
_exptl_absorpt_correction_type    multi-scan
_exptl_absorpt_correction_T_min   0.3400
_exptl_absorpt_correction_T_max   1.0000
_exptl_absorpt_process_details
;
 'ABSCOR (Higashi, 1995)'
;

_exptl_special_details
;
 ?
;

_diffrn_ambient_temperature       173(2)
_diffrn_radiation_wavelength      0.71075
_diffrn_radiation_type            MoK\a
_diffrn_radiation_source          'long-fine-focus sealed tube'
_diffrn_radiation_monochromator   Graphite
_diffrn_measurement_device_type   'Rigaku SCXmini'
_diffrn_measurement_method        \w-scans
_diffrn_detector_area_resol_mean  10.0
_diffrn_standards_number          ?
_diffrn_standards_interval_count  ?
_diffrn_standards_interval_time   ?
_diffrn_standards_decay_%         ?
_diffrn_reflns_number             9381
_diffrn_reflns_av_R_equivalents   0.0593
_diffrn_reflns_av_sigmaI/netI     0.0771
_diffrn_reflns_limit_h_min        -5
_diffrn_reflns_limit_h_max        5
_diffrn_reflns_limit_k_min        -18
_diffrn_reflns_limit_k_max        18
_diffrn_reflns_limit_l_min        -20
_diffrn_reflns_limit_l_max        19
_diffrn_reflns_theta_min          3.16
_diffrn_reflns_theta_max          27.49
_reflns_number_total              4175
_reflns_number_gt                 3743
_reflns_threshold_expression      >2sigma(I)

_computing_data_collection        PROCESS-AUTO
_computing_cell_refinement        PROCESS-AUTO
_computing_data_reduction         ?
_computing_structure_solution     SIR-97
_computing_structure_refinement   'SHELXL-97 (Sheldrick, 1997)'
_computing_molecular_graphics 'Yadokari-XG 2009 (Wakita Nemoto et al., 2009)'
_computing_publication_material
;Yadokari-XG 2009 (Wakita,Nemoto et al., 2009)
;

_refine_special_details
;
 Refinement of F^2^ against ALL reflections.  The weighted R-factor wR and
 goodness of fit S are based on F^2^, conventional R-factors R are based
 on F, with F set to zero for negative F^2^. The threshold expression of
 F^2^ > 2sigma(F^2^) is used only for calculating R-factors(gt) etc. and is
 not relevant to the choice of reflections for refinement.  R-factors based
 on F^2^ are statistically about twice as large as those based on F, and R-
 factors based on ALL data will be even larger.
;

_refine_ls_structure_factor_coef  Fsqd
_refine_ls_matrix_type            full
_refine_ls_weighting_scheme       calc
_refine_ls_weighting_details
 'calc w=1/[\s^2^(Fo^2^)+(0.0261P)^2^+0.0000P] where P=(Fo^2^+2Fc^2^)/3'
_atom_sites_solution_primary      direct
_atom_sites_solution_secondary    difmap
_atom_sites_solution_hydrogens    geom
_refine_ls_hydrogen_treatment     constr
_refine_ls_extinction_method      none
_refine_ls_extinction_coef        ?
_refine_ls_abs_structure_details
 'Flack H D (1983), Acta Cryst. A39, 876-881'
_refine_ls_abs_structure_Flack    0.021(17)
_refine_ls_number_reflns          4175
_refine_ls_number_parameters      181
_refine_ls_number_restraints      1
_refine_ls_R_factor_all           0.0499
_refine_ls_R_factor_gt            0.0425
_refine_ls_wR_factor_ref          0.0928
_refine_ls_wR_factor_gt           0.0895
_refine_ls_goodness_of_fit_ref    1.032
_refine_ls_restrained_S_all       1.032
_refine_ls_shift/su_max           0.001
_refine_ls_shift/su_mean          0.000

loop_
 _atom_site_label
 _atom_site_type_symbol
 _atom_site_fract_x
 _atom_site_fract_y
 _atom_site_fract_z
 _atom_site_U_iso_or_equiv
 _atom_site_adp_type
 _atom_site_occupancy
 _atom_site_symmetry_multiplicity
 _atom_site_calc_flag
 _atom_site_refinement_flags
 _atom_site_disorder_assembly
 _atom_site_disorder_group
C1 C 1.112(2) 0.9174(6) 0.9920(7) 0.025(2) Uani 1 1 d . . .
C2 C 1.228(2) 1.0001(6) 0.9548(6) 0.025(2) Uani 1 1 d . . .
C3 C 1.380(2) 1.0680(6) 1.0054(7) 0.027(2) Uani 1 1 d . . .
H3 H 1.4586 1.1244 0.9804 0.033 Uiso 1 1 calc R . .
C4 C 1.416(2) 1.0524(6) 1.0937(7) 0.026(2) Uani 1 1 d . . .
C5 C 1.311(2) 0.9710(7) 1.1312(6) 0.029(2) Uani 1 1 d . . .
H5 H 1.3420 0.9609 1.1912 0.035 Uiso 1 1 calc R . .
C6 C 1.157(2) 0.9030(7) 1.0797(7) 0.030(2) Uani 1 1 d . . .
I1 I 1.19215(18) 1.02506(5) 0.82312(4) 0.03664(18) Uani 1 1 d . . .
Cl1 Cl 1.5934(7) 1.13901(18) 1.15623(18) 0.0380(6) Uani 1 1 d . . .
I2 I 1.01887(16) 0.77802(5) 1.13893(5) 0.03425(18) Uani 1 1 d . . .
Br1 Br 0.8921(3) 0.82709(7) 0.92378(7) 0.0331(2) Uani 1 1 d . . .
C7 C 1.198(2) 1.0981(6) 1.5029(7) 0.029(2) Uani 1 1 d . . .
C8 C 1.087(2) 1.0845(6) 1.4160(6) 0.020(2) Uani 1 1 d . . .
C9 C 1.128(3) 1.1534(7) 1.3562(6) 0.029(2) Uani 1 1 d . . .
H9 H 1.0575 1.1448 1.2983 0.035 Uiso 1 1 calc R . .
C10 C 1.277(3) 1.2365(6) 1.3826(7) 0.030(2) Uani 1 1 d . . .
C11 C 1.389(3) 1.2524(7) 1.4630(6) 0.030(2) Uani 1 1 d . . .
H11 H 1.4959 1.3098 1.4771 0.036 Uiso 1 1 calc R . .
C12 C 1.346(2) 1.1847(7) 1.5243(6) 0.025(2) Uani 1 1 d . . .
I3 I 0.87072(16) 0.95789(5) 1.37608(4) 0.03183(17) Uani 1 1 d . . .
Cl2 Cl 1.3368(9) 1.3231(2) 1.30331(17) 0.0476(8) Uani 1 1 d . . .
I4 I 1.52261(15) 1.21137(4) 1.64845(4) 0.02838(16) Uani 1 1 d . . .
Br2 Br 1.1449(3) 1.00132(7) 1.58440(7) 0.0339(3) Uani 1 1 d . . .

loop_
 _atom_site_aniso_label
 _atom_site_aniso_U_11
 _atom_site_aniso_U_22
 _atom_site_aniso_U_33
 _atom_site_aniso_U_23
 _atom_site_aniso_U_13
 _atom_site_aniso_U_12
C1 0.023(5) 0.019(4) 0.034(6) -0.008(4) -0.001(4) 0.006(4)
C2 0.025(5) 0.022(5) 0.028(5) 0.004(4) 0.000(4) 0.004(4)
C3 0.024(5) 0.023(5) 0.036(6) -0.001(4) 0.013(4) 0.001(4)
C4 0.025(5) 0.020(5) 0.034(6) -0.009(4) -0.002(4) 0.010(4)
C5 0.038(6) 0.025(5) 0.023(5) -0.002(4) 0.008(4) -0.005(4)
C6 0.022(5) 0.028(5) 0.041(7) 0.006(5) 0.007(4) 0.005(4)
I1 0.0516(4) 0.0323(4) 0.0261(4) 0.0011(3) 0.0020(3) 0.0037(3)
Cl1 0.0467(16) 0.0294(13) 0.0372(16) -0.0025(12) -0.0106(13) -0.0090(12)
I2 0.0333(4) 0.0321(4) 0.0373(4) 0.0093(3) -0.0022(3) -0.0076(3)
Br1 0.0399(6) 0.0265(5) 0.0325(6) -0.0064(5) -0.0063(5) -0.0011(5)
C7 0.030(5) 0.024(5) 0.033(6) 0.008(4) 0.007(5) 0.009(4)
C8 0.020(4) 0.016(4) 0.025(5) -0.007(4) -0.007(4) 0.001(4)
C9 0.038(6) 0.030(5) 0.018(5) -0.007(4) 0.000(4) 0.006(5)
C10 0.042(6) 0.018(5) 0.029(6) 0.000(4) 0.003(5) -0.004(5)
C11 0.042(6) 0.022(5) 0.028(6) 0.001(4) 0.007(5) -0.003(4)
C12 0.021(5) 0.032(5) 0.022(5) 0.002(4) 0.000(4) 0.005(4)
I3 0.0304(3) 0.0279(3) 0.0371(4) -0.0061(3) -0.0015(3) -0.0044(3)
Cl2 0.087(2) 0.0289(13) 0.0263(14) 0.0044(12) -0.0048(15) -0.0108(16)
I4 0.0295(3) 0.0310(3) 0.0244(3) -0.0010(3) -0.0026(3) 0.0005(3)
Br2 0.0480(6) 0.0248(5) 0.0291(6) 0.0029(4) 0.0023(5) -0.0035(5)

_geom_special_details
;
 All esds (except the esd in the dihedral angle between two l.s. planes)
 are estimated using the full covariance matrix.  The cell esds are taken
 into account individually in the estimation of esds in distances, angles
 and torsion angles; correlations between esds in cell parameters are only
 used when they are defined by crystal symmetry.  An approximate (isotropic)
 treatment of cell esds is used for estimating esds involving l.s. planes.
;

loop_
 _geom_bond_atom_site_label_1
 _geom_bond_atom_site_label_2
 _geom_bond_distance
 _geom_bond_site_symmetry_2
 _geom_bond_publ_flag
C1 C6 1.389(14) . ?
C1 C2 1.397(13) . ?
C1 Br1 1.884(9) . ?
C2 C3 1.386(13) . ?
C2 I1 2.082(10) . ?
C3 C4 1.395(14) . ?
C3 H3 0.9500 . ?
C4 C5 1.370(14) . ?
C4 Cl1 1.721(10) . ?
C5 C6 1.397(14) . ?
C5 H5 0.9500 . ?
C6 I2 2.084(10) . ?
C7 C12 1.406(13) . ?
C7 C8 1.432(14) . ?
C7 Br2 1.885(9) . ?
C8 C9 1.363(13) . ?
C8 I3 2.093(9) . ?
C9 C10 1.386(14) . ?
C9 H9 0.9500 . ?
C10 C11 1.343(14) . ?
C10 Cl2 1.762(10) . ?
C11 C12 1.368(13) . ?
C11 H11 0.9500 . ?
C12 I4 2.085(9) . ?

loop_
 _geom_angle_atom_site_label_1
 _geom_angle_atom_site_label_2
 _geom_angle_atom_site_label_3
 _geom_angle
 _geom_angle_site_symmetry_1
 _geom_angle_site_symmetry_3
 _geom_angle_publ_flag
C6 C1 C2 119.5(9) . . ?
C6 C1 Br1 120.3(7) . . ?
C2 C1 Br1 120.2(8) . . ?
C3 C2 C1 120.2(9) . . ?
C3 C2 I1 117.5(7) . . ?
C1 C2 I1 122.3(7) . . ?
C2 C3 C4 119.1(9) . . ?
C2 C3 H3 120.5 . . ?
C4 C3 H3 120.5 . . ?
C5 C4 C3 121.7(9) . . ?
C5 C4 Cl1 119.7(8) . . ?
C3 C4 Cl1 118.6(7) . . ?
C4 C5 C6 118.8(9) . . ?
C4 C5 H5 120.6 . . ?
C6 C5 H5 120.6 . . ?
C1 C6 C5 120.7(9) . . ?
C1 C6 I2 121.9(7) . . ?
C5 C6 I2 117.3(8) . . ?
C12 C7 C8 118.0(8) . . ?
C12 C7 Br2 122.2(8) . . ?
C8 C7 Br2 119.8(7) . . ?
C9 C8 C7 120.3(8) . . ?
C9 C8 I3 118.2(7) . . ?
C7 C8 I3 121.5(7) . . ?
C8 C9 C10 118.0(9) . . ?
C8 C9 H9 121.0 . . ?
C10 C9 H9 121.0 . . ?
C11 C10 C9 124.0(9) . . ?
C11 C10 Cl2 119.0(7) . . ?
C9 C10 Cl2 117.0(8) . . ?
C10 C11 C12 119.0(9) . . ?
C10 C11 H11 120.5 . . ?
C12 C11 H11 120.5 . . ?
C11 C12 C7 120.7(9) . . ?
C11 C12 I4 118.1(7) . . ?
C7 C12 I4 121.2(7) . . ?

loop_
 _geom_torsion_atom_site_label_1
 _geom_torsion_atom_site_label_2
 _geom_torsion_atom_site_label_3
 _geom_torsion_atom_site_label_4
 _geom_torsion
 _geom_torsion_site_symmetry_1
 _geom_torsion_site_symmetry_2
 _geom_torsion_site_symmetry_3
 _geom_torsion_site_symmetry_4
 _geom_torsion_publ_flag
C6 C1 C2 C3 -1.4(13) . . . . ?
Br1 C1 C2 C3 177.7(7) . . . . ?
C6 C1 C2 I1 177.0(7) . . . . ?
Br1 C1 C2 I1 -3.9(11) . . . . ?
C1 C2 C3 C4 0.1(13) . . . . ?
I1 C2 C3 C4 -178.3(7) . . . . ?
C2 C3 C4 C5 1.4(14) . . . . ?
C2 C3 C4 Cl1 -177.9(7) . . . . ?
C3 C4 C5 C6 -1.6(15) . . . . ?
Cl1 C4 C5 C6 177.8(8) . . . . ?
C2 C1 C6 C5 1.2(14) . . . . ?
Br1 C1 C6 C5 -177.9(7) . . . . ?
C2 C1 C6 I2 -176.0(7) . . . . ?
Br1 C1 C6 I2 4.9(11) . . . . ?
C4 C5 C6 C1 0.2(15) . . . . ?
C4 C5 C6 I2 177.6(7) . . . . ?
C12 C7 C8 C9 0.9(14) . . . . ?
Br2 C7 C8 C9 -179.1(8) . . . . ?
C12 C7 C8 I3 179.0(7) . . . . ?
Br2 C7 C8 I3 -1.0(11) . . . . ?
C7 C8 C9 C10 -0.7(15) . . . . ?
I3 C8 C9 C10 -178.8(8) . . . . ?
C8 C9 C10 C11 1.4(17) . . . . ?
C8 C9 C10 Cl2 178.4(8) . . . . ?
C9 C10 C11 C12 -2.2(17) . . . . ?
Cl2 C10 C11 C12 -179.3(8) . . . . ?
C10 C11 C12 C7 2.4(15) . . . . ?
C10 C11 C12 I4 179.9(8) . . . . ?
C8 C7 C12 C11 -1.8(14) . . . . ?
Br2 C7 C12 C11 178.2(8) . . . . ?
C8 C7 C12 I4 -179.2(7) . . . . ?
Br2 C7 C12 I4 0.8(11) . . . . ?

_diffrn_measured_fraction_theta_max    0.998
_diffrn_reflns_theta_full              27.49
_diffrn_measured_fraction_theta_full   0.998
_refine_diff_density_max    1.539
_refine_diff_density_min   -0.935
_refine_diff_density_rms    0.198
_publ_section_references
;Wakita, K. (2001). Yadokari-XG. Software for Crystal Structure Analyses. \nRele
;
_chemical_absolute_configuration  ?
